# Supplementary material for: Two convergent pathways of DNA knotting in replicating DNA molecules as revealed by θ-curve analysis
Source: PubMed Central journal article supplement (PMC6158496; doi:10.1093/nar/gky559), 2018-06-30
Supplement: gky559_supplemental_figures.pdf [file gky559_supplemental_figures.pdf]

| $\theta$          | Constituent Knots | $u$ | $\theta$          | Constituent Knots | $u$ | $\theta$          | Constituent Knots | $u$ |
|-------------------|-------------------|-----|-------------------|-------------------|-----|-------------------|-------------------|-----|
| $\theta_{3_1}$    | $2x0_1$ $3_1$     | 1   | $\theta_{7_6}$    | $2x0_1$ $3_1$     | 1   | $\theta_{7_{36}}$ | $0_1$ $5_1$ $7_3$ | 2   |
| $\theta_{4_1}$    | $2x0_1$ $4_1$     | 1   | $\theta_{7_7}$    | $2x0_1$ $3_1$     | 1   | $\theta_{7_{37}}$ | $0_1$ $5_2$ $7_3$ | 2   |
| $\theta_{5_1}$    | $3x0_1$           | 1   | $\theta_{7_8}$    | $0_1$ $2x3_1$     | 2   | $\theta_{7_{38}}$ | $2x0_1$ $7_4$     | 2   |
| $\theta_{5_2}$    | $2x0_1$ $3_1$     | 1   | $\theta_{7_9}$    | $0_1$ $2x3_1$     | 1   | $\theta_{7_{39}}$ | $2x0_1$ $7_4$     | 2   |
| $\theta_{5_3}$    | $2x0_1$ $5_1$     | 2   | $\theta_{7_{10}}$ | $0_1$ $2x3_1$     | 2   | $\theta_{7_{40}}$ | $0_1$ $3_1$ $7_4$ | 2   |
| $\theta_{5_4}$    | $0_1$ $3_1$ $5_1$ | 2   | $\theta_{7_{11}}$ | $2x0_1$ $5_2$     | 1   | $\theta_{7_{41}}$ | $0_1$ $3_1$ $7_4$ | 2   |
| $\theta_{5_5}$    | $2x0_1$ $5_2$     | 1   | $\theta_{7_{12}}$ | $2x0_1$ $4_1$     | 1   | $\theta_{7_{42}}$ | $0_1$ $5_2$ $7_4$ | 2   |
| $\theta_{5_6}$    | $2x0_1$ $5_2$     | 1   | $\theta_{7_{13}}$ | $2x0_1$ $4_1$     | 1   | $\theta_{7_{43}}$ | $2x0_1$ $7_5$     | 2   |
| $\theta_{5_7}$    | $0_1$ $3_1$ $5_2$ | 1   | $\theta_{7_{14}}$ | $0_1$ $2x4_1$     | 1   | $\theta_{7_{44}}$ | $2x0_1$ $7_5$     | 2   |
| $\theta_{6_1}$    | $3x0_1$           | 1   | $\theta_{7_{15}}$ | $2x0_1$ $5_1$     | 2   | $\theta_{7_{45}}$ | $0_1$ $3_1$ $7_5$ | 2   |
| $\theta_{6_2}$    | $2x0_1$ $3_1$     | 1   | $\theta_{7_{16}}$ | $2x0_1$ $5_1$     | 2   | $\theta_{7_{46}}$ | $0_1$ $3_1$ $7_5$ | 2   |
| $\theta_{6_3}$    | $0_1$ $3_1$ $4_1$ | 1   | $\theta_{7_{17}}$ | $2x0_1$ $5_1$     | 2   | $\theta_{7_{47}}$ | $0_1$ $3_1$ $7_5$ | 2   |
| $\theta_{6_4}$    | $0_1$ $3_1$ $4_1$ | 1   | $\theta_{7_{18}}$ | $0_1$ $5_1$ $5_2$ | 2   | $\theta_{7_{48}}$ | $0_1$ $5_1$ $7_5$ | 2   |
| $\theta_{6_5}$    | $2x0_1$ $6_1$     | 1   | $\theta_{7_{19}}$ | $2x0_1$ $5_2$     | 1   | $\theta_{7_{49}}$ | $0_1$ $5_2$ $7_5$ | 2   |
| $\theta_{6_6}$    | $2x0_1$ $6_1$     | 1   | $\theta_{7_{20}}$ | $2x0_1$ $5_2$     | 1   | $\theta_{7_{50}}$ | $2x0_1$ $7_6$     | 1   |
| $\theta_{6_7}$    | $2x0_1$ $6_1$     | 1   | $\theta_{7_{21}}$ | $2x0_1$ $5_2$     | 1   | $\theta_{7_{51}}$ | $2x0_1$ $7_6$     | 1   |
| $\theta_{6_8}$    | $0_1$ $4_1$ $6_1$ | 1   | $\theta_{7_{22}}$ | $0_1$ $3_1$ $5_2$ | 2   | $\theta_{7_{52}}$ | $2x0_1$ $7_6$     | 1   |
| $\theta_{6_9}$    | $2x0_1$ $6_2$     | 1   | $\theta_{7_{23}}$ | $0_1$ $4_1$ $5_2$ | 2   | $\theta_{7_{53}}$ | $2x0_1$ $7_6$     | 1   |
| $\theta_{6_{10}}$ | $2x0_1$ $6_2$     | 1   | $\theta_{7_{24}}$ | $0_1$ $4_1$ $5_2$ | 2   | $\theta_{7_{54}}$ | $2x0_1$ $7_6$     | 1   |
| $\theta_{6_{11}}$ | $2x0_1$ $6_2$     | 1   | $\theta_{7_{25}}$ | $2x0_1$ $7_1$     | 3   | $\theta_{7_{55}}$ | $0_1$ $3_1$ $7_6$ | 2   |
| $\theta_{6_{12}}$ | $0_1$ $3_1$ $6_2$ | 2   | $\theta_{7_{26}}$ | $0_1$ $3_1$ $7_1$ | 3   | $\theta_{7_{56}}$ | $0_1$ $3_1$ $7_6$ | 1   |
| $\theta_{6_{13}}$ | $0_1$ $4_1$ $6_2$ | 1   | $\theta_{7_{27}}$ | $0_1$ $5_1$ $7_1$ | 3   | $\theta_{7_{57}}$ | $0_1$ $4_1$ $7_6$ | 2   |
| $\theta_{6_{14}}$ | $2x0_1$ $6_3$     | 1   | $\theta_{7_{28}}$ | $2x0_1$ $7_2$     | 1   | $\theta_{7_{58}}$ | $0_1$ $5_2$ $7_6$ | 2   |
| $\theta_{6_{15}}$ | $2x0_1$ $6_3$     | 1   | $\theta_{7_{29}}$ | $2x0_1$ $7_2$     | 1   | $\theta_{7_{59}}$ | $2x0_1$ $7_7$     | 1   |
| $\theta_{6_{16}}$ | $0_1$ $3_1$ $6_3$ | 1   | $\theta_{7_{30}}$ | $2x0_1$ $7_2$     | 1   | $\theta_{7_{60}}$ | $2x0_1$ $7_7$     | 1   |
| $\theta_{7_1}$    | $3x0_1$           | 1   | $\theta_{7_{31}}$ | $0_1$ $3_1$ $7_2$ | 1   | $\theta_{7_{61}}$ | $2x0_1$ $7_7$     | 1   |
| $\theta_{7_2}$    | $3x0_1$           | 1   | $\theta_{7_{32}}$ | $0_1$ $5_2$ $7_2$ | 1   | $\theta_{7_{62}}$ | $2x0_1$ $7_7$     | 1   |
| $\theta_{7_3}$    | $3x0_1$           | 1   | $\theta_{7_{33}}$ | $2x0_1$ $7_3$     | 2   | $\theta_{7_{63}}$ | $2x0_1$ $7_7$     | 1   |
| $\theta_{7_4}$    | $3x0_1$           | 1   | $\theta_{7_{34}}$ | $2x0_1$ $7_3$     | 2   | $\theta_{7_{64}}$ | $0_1$ $3_1$ $7_7$ | 2   |
| $\theta_{7_5}$    | $2x0_1$ $3_1$     | 2   | $\theta_{7_{35}}$ | $0_1$ $3_1$ $7_3$ | 2   | $\theta_{7_{65}}$ | $0_1$ $4_1$ $7_7$ | 1   |

TABLE S1. Theta-curves, their constituent knots, and their unknotting numbers.

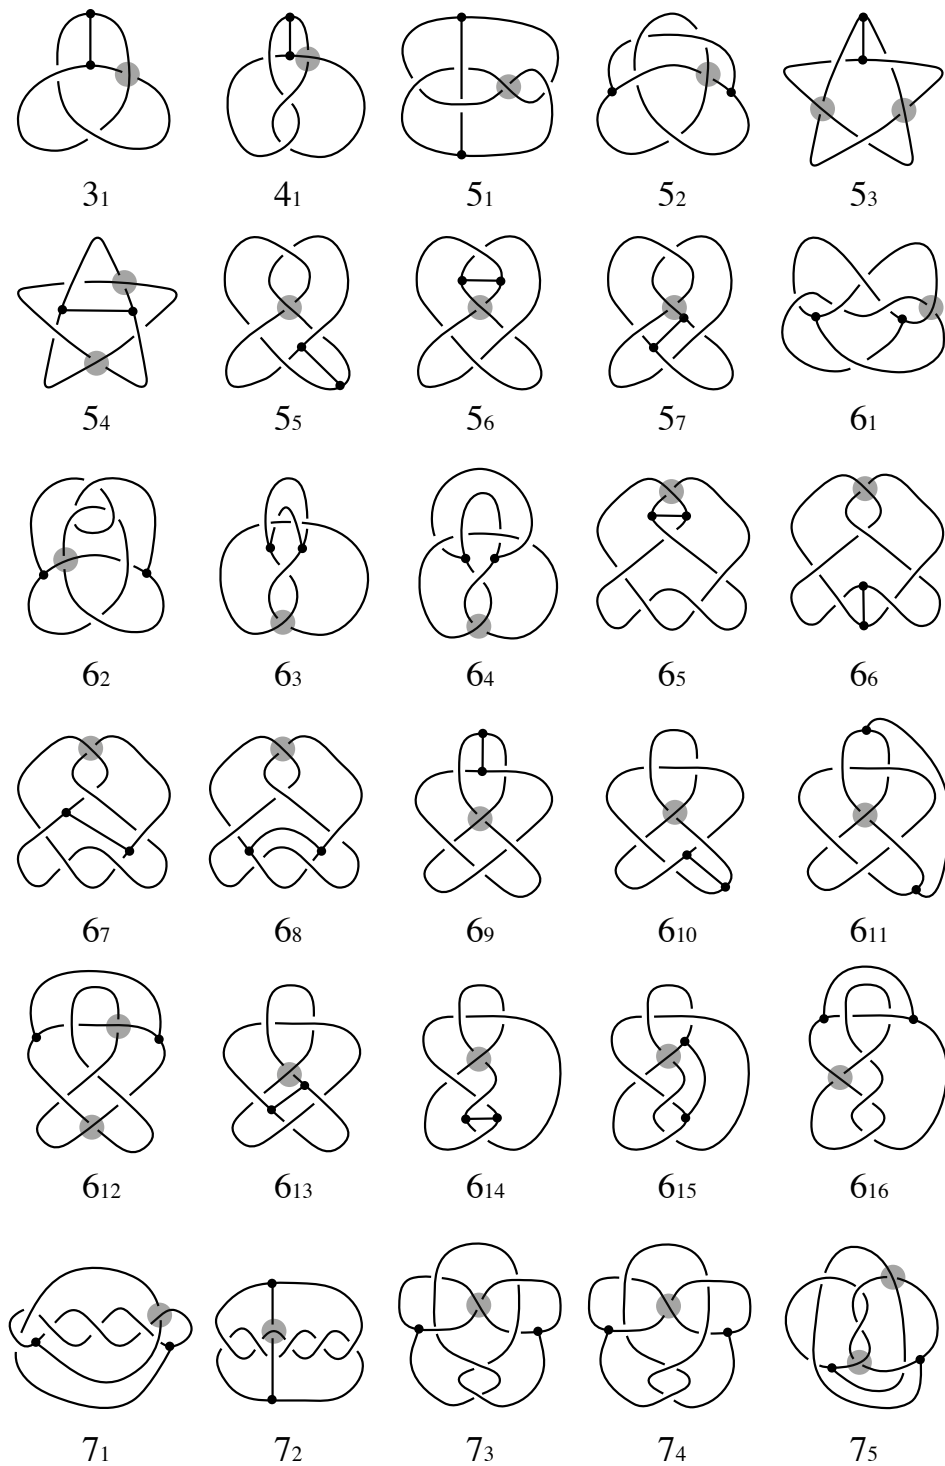

FIGURE S1. Theta-curves with their unknotting crossing changes shown in gray.

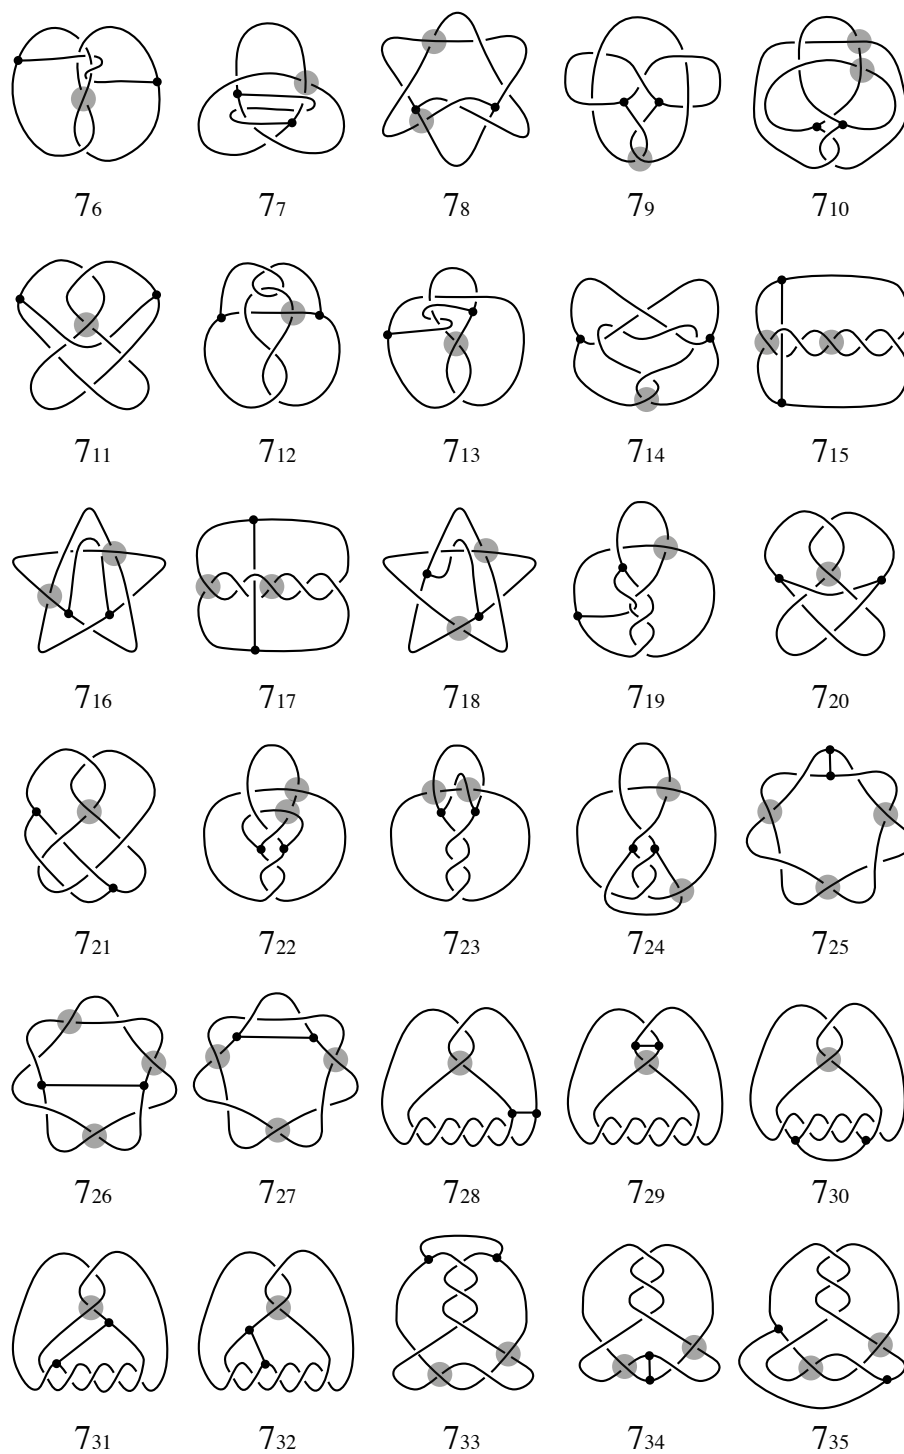

FIGURE S1. CONTINUED.  $\theta$ -curves with their unknotting crossing changes shown in gray.

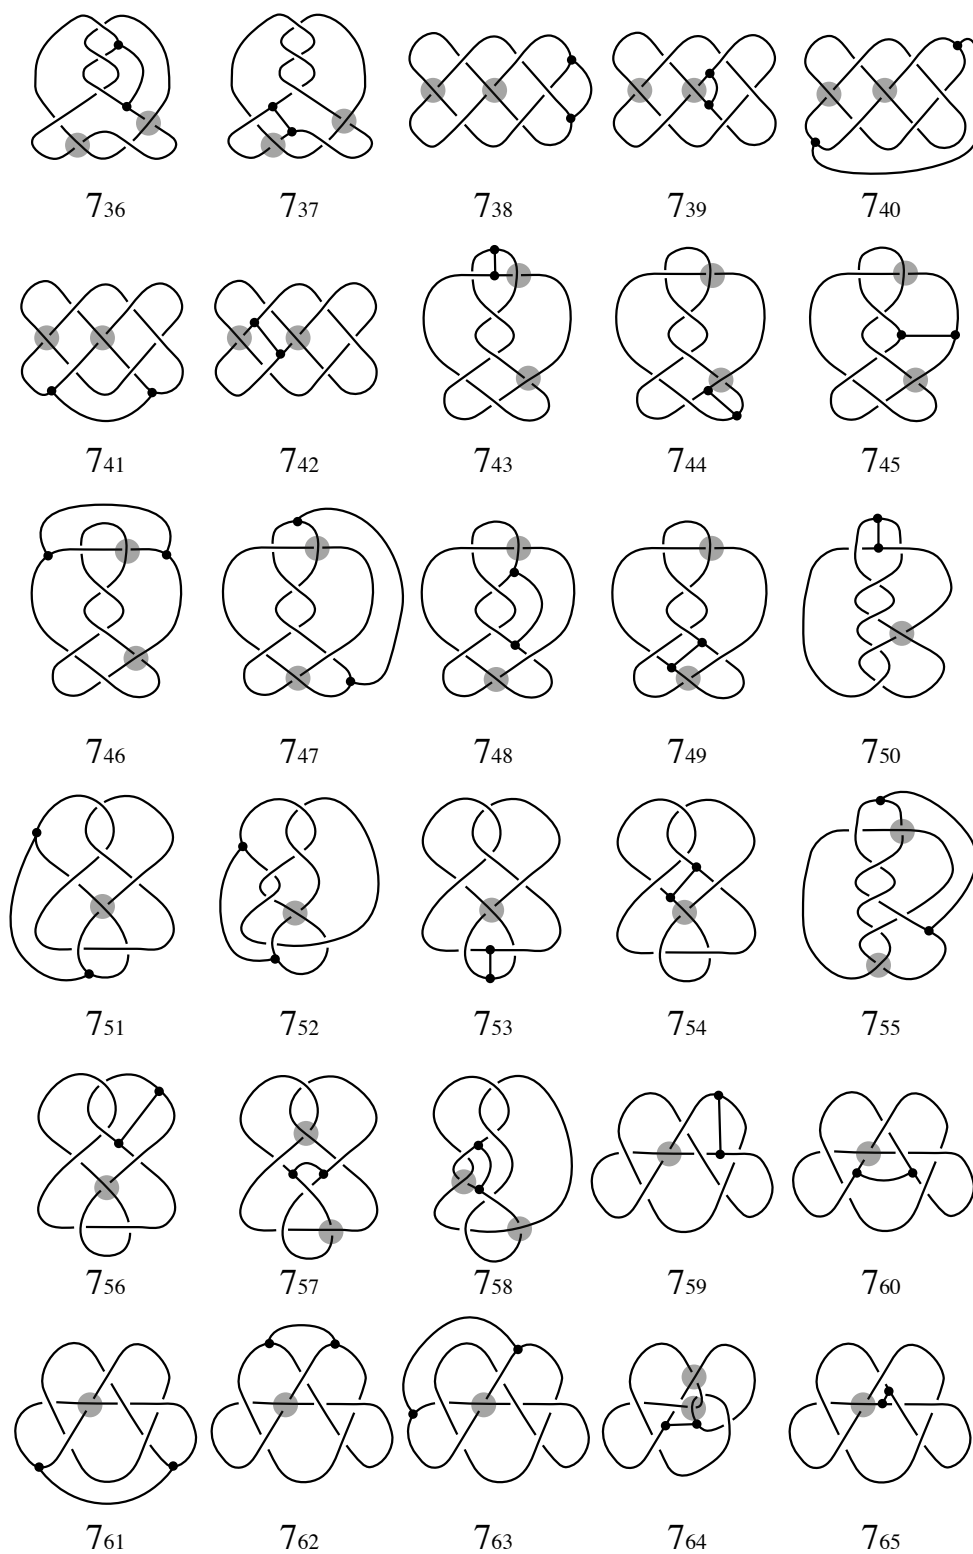

FIGURE S1. CONTINUED.  $\theta$ -curves with their unknotting crossing changes shown in gray.
